# Supplementary material for: Comparison of Optimal Estimation HDO/H2O Retrievals from AIRS with ORACLES measurements
Source: Copernicus journal article supplement (doi:10.5194/amt-2019-195), 2019-09-30
Supplement: Supplementary file 1 [file amt-2019-195-supplement.pdf]

1 Supplement to: **Comparison of Optimal Estimation HDO/H<sub>2</sub>O Retrievals from AIRS**  
2 **with ORACLES measurements**

3

4 Robert L. Herman<sup>1</sup>, John Worden<sup>1</sup>, David Noone<sup>2</sup>, Dean Henze<sup>2</sup>, Kevin Bowman<sup>1</sup>, Karen  
5 Cady-Pereira<sup>3</sup>, Vivienne H. Payne<sup>1</sup>, Susan S. Kulawik<sup>4</sup>, and Dejian Fu<sup>1</sup>

6

7 [1] Jet Propulsion Laboratory, California Institute of Technology, Pasadena, California,  
8 USA.

9 [2] College of Earth, Ocean, and Atmospheric Sciences, Oregon State University,  
10 Corvallis, Oregon, USA.

11 [3] Atmospheric and Environmental Research, Inc. (AER), Lexington, Massachusetts,  
12 USA.

13 [4] Bay Area Environmental Research Institute, Petaluma, California, USA.

14 Correspondence to: R. L. Herman ([Robert.L.Herman@jpl.nasa.gov](mailto:Robert.L.Herman@jpl.nasa.gov))

15 © 2019. All rights reserved.

16 **Sensitivity of retrievals to the choice of forward model**

17 In this supplement we assess the sensitivity of HDO and H<sub>2</sub>O retrievals to the choice of  
18 forward model. All the retrievals in this paper were obtained from the MUSES retrieval  
19 framework using the Optimal Spectral Sampling (OSS) forward model (Moncet et al.,  
20 2008, 2015). The OSS method was designed specifically for the modeling of radiances  
21 measured by sounding radiometers in the infrared (Moncet et al., 2008, 2015), although it  
22 is applicable throughout the microwave, visible, and ultraviolet spectral regions. OSS  
23 uses an extension of the exponential sum fitting of transmittances technique in that  
24 channel-average radiative transfer is obtained from a weighted sum of monochromatic  
25 calculations. Among the advantages of the OSS method is that its numerical accuracy,  
26 with respect to a reference line-by-line model, is selectable, allowing the model to  
27 provide whatever balance of accuracy and computational speed is optimal for a particular  
28 application. Only a few monochromatic points are required to model channel radiances  
29 with a brightness temperature accuracy of 0.05 K. The version of OSS used here is  
30 trained with the monochromatic Atmospheric and Environmental Research, Inc. (AER)  
31 Line-By-Line Radiative Transfer Model (LBLRTM\_v12.4) (Clough et al., 2005) using  
32 spectroscopic parameters from the ‘High-resolution TRANsmision’ database  
33 (HITRAN12) (Rothman et al., 2013) plus line coupling coefficients for CO<sub>2</sub> and CH<sub>4</sub>  
34 calculated at AER.

35

36 Historically, retrievals from the TES instrument were carried out using the operational  
37 ‘Earth Limb and Nadir Operational Retrieval’ (ELANOR) code as a forward model  
38 (Clough et al., 2006). ELANOR incorporates most of the physics contained in LBLRTM,

39 but rather than calculating molecular optical depths line-by-line, it uses pre-calculated  
40 look-up tables of absorption coefficients indexed by species, pressure and temperature.  
41 The coefficients in this table were generated by running LBLRTM\_v12.4 with the same  
42 line file as used for OSS. Since ELANOR runs calculations on a fine spectral grid, and  
43 the timing for calculations scales according to the number of spectral points, it is an order  
44 of magnitude slower than OSS. This was the main motivation for switching to OSS for  
45 MUSES in general and these AIRS retrievals in particular.

46  
47 Both OSS and ELANOR have been extensively validated against results from LBLRTM.  
48 However, there are some differences in the details of implementation. For example,  
49 ELANOR treats the HDO as a completely separate molecule from the main water  
50 isotopologue, whereas OSS treats HDO in terms of a ratio to the main isotopologue. This  
51 leads to some differences in the water vapor Jacobians. In addition, there are some minor  
52 differences in the implementation of the cloud optical depth Jacobians. In order to  
53 provide some insight into the impact of differences between the two models, the  
54 retrievals from AIRS during a single day of the ORACLES campaign (August 31, 2016)  
55 were run using both models and the differences between the models were compared to  
56 the AIRS minus WISPER differences (Figure S1). Percent differences between A and B  
57 are calculated as  $100*(A-B)/[0.5*(A+B)]$ .

58  
59 The H<sub>2</sub>O results (Figure S1, top panels) show that between the surface and 4 km altitude  
60 OSS retrievals are biased low compared to the WISPER data, while ELANOR retrievals  
61 are biased low compared to OSS retrievals; therefore OSS H<sub>2</sub>O retrievals appear more

62 accurate. The HDO results (Figure 1, bottom panels) show that the AIRS OSS retrievals  
63 were on average unbiased at the surface and at 3.5 km, and presented a small negative  
64 bias between those altitudes, which peaked around 2 km. ELANOR retrievals are biased  
65 high with respect to OSS retrievals over this range, especially between the surface and 2  
66 km, which implies that HDO from ELANOR is too high at the surface but agrees better  
67 with the WISPER data with increasing altitude up to 3.5 km. Above this altitude  
68 ELANOR retrievals are biased low with respect to OSS retrievals, and therefore present a  
69 larger negative bias with respect to WISPER than the OSS retrievals do. Overall, the OSS  
70 results agree better with the WISPER data than the ELANOR retrievals.

71

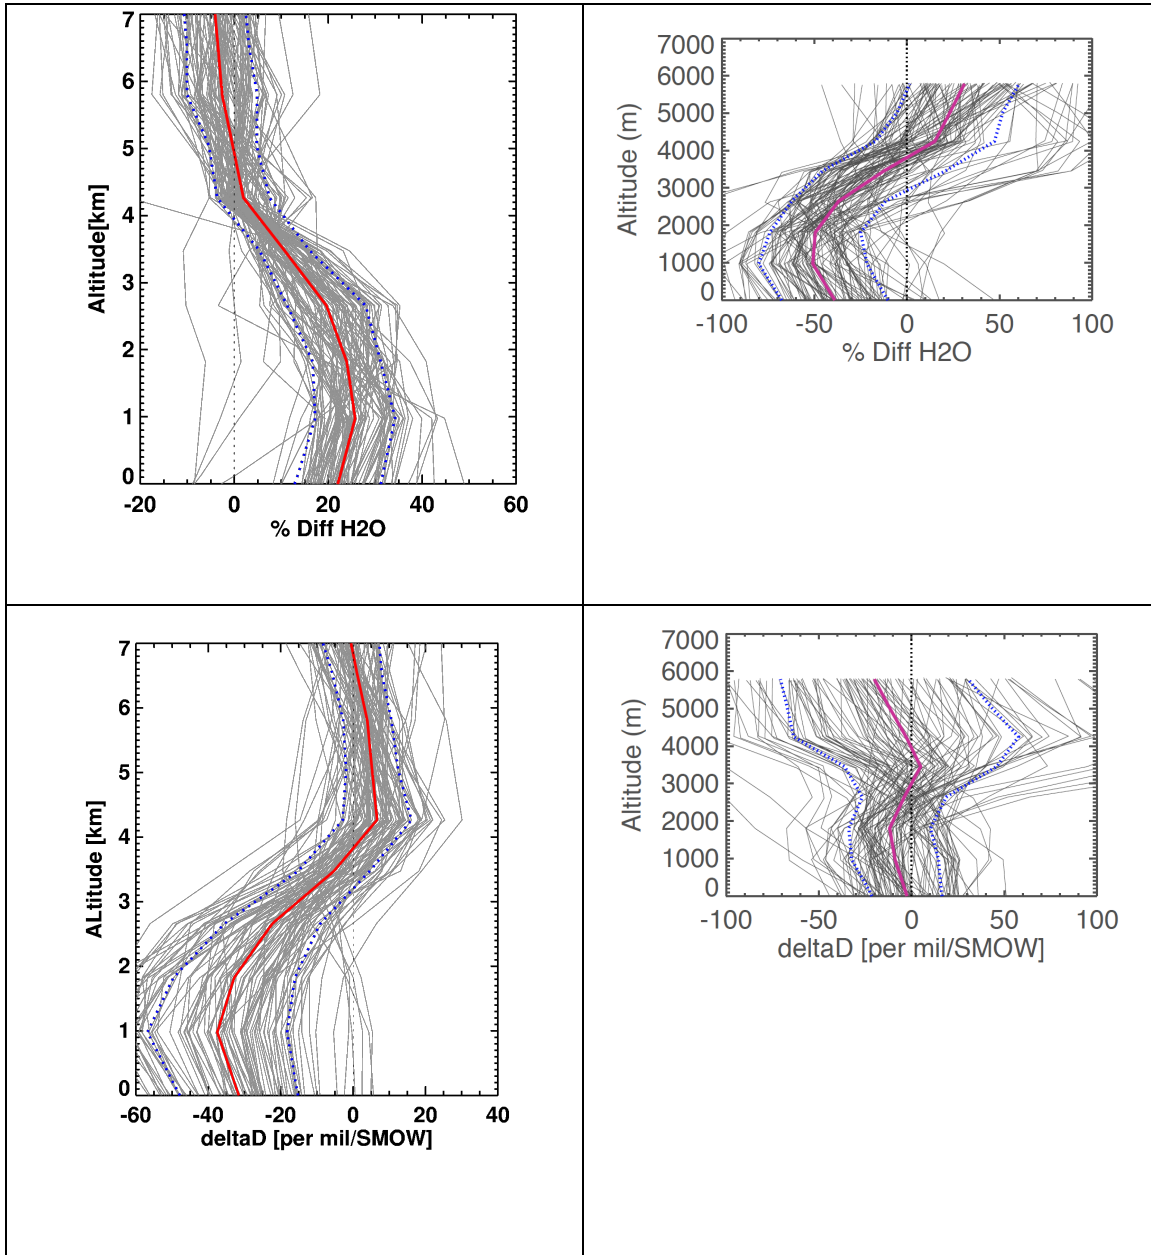

72

73 **Figure S1.** AIRS OSS H<sub>2</sub>O (top) and Delta-D (bottom) biases with respect to ELANOR  
 74 retrievals (left) and WISPER data (right). Lines are individual profiles (black lines), mean  
 75 (red solid line) and mean  $\pm$  RMS (dotted blue lines).

76

77

78 **Code/Data availability.** The ORACLES aircraft data used in the data analysis can be  
79 freely downloaded from the following Digital Object Identifier:  
80 ([http://dx.doi.org/10.5067/Suborbital/ORACLES/P3/2016\\_V1](http://dx.doi.org/10.5067/Suborbital/ORACLES/P3/2016_V1), last access: 22 April  
81 2017). We expect the AIRS-based deuterium data to be publicly released by January  
82 2020. Files in IDL format of the AIRS data shown and forward model output are  
83 available from coauthor John Worden upon request: [john.r.worden@jpl.nasa.gov](mailto:john.r.worden@jpl.nasa.gov).

84  
85 **Team list.** Robert L. Herman (RH), John Worden (JW), David Noone (DN), Dean  
86 Henze (DH), Kevin Bowman (KB), Karen Cady-Pereira (KC), Vivienne H. Payne (VP),  
87 Susan S. Kulawik (SK), and Dejian Fu (DF).

88  
89 **Author contribution.** RH carried out all steps of aircraft validation, from matching data  
90 and quality filtering to applying observation operator and statistics, while JW provided  
91 satellite-to-satellite validation. JW developed the retrieval strategies for both AIRS and  
92 TES HDO/H<sub>2</sub>O retrievals. DF and SK built the strategies of single AIRS footprint  
93 HDO/H<sub>2</sub>O retrievals into the MUSES algorithm. KC, RH and VP evaluated the  
94 sensitivities of retrievals to the choice of forward model. RH, VP, JW, SK, DF, DN, DH  
95 and KB contributed to the text and interpretation of the results. JW and SK helped in the  
96 estimation of HDO/H<sub>2</sub>O measurement uncertainty, quality flagging and knowledge of the  
97 retrieval process. DN and DH provided ORACLES data, aircraft measurement  
98 uncertainty, and identified profiles in the aircraft data. All authors participated in writing  
99 the manuscript.

100

101 **Competing interests.** The authors declare that they have no conflict of interest.

102

103 **Acknowledgements**

104 Part of the research described in this paper was carried out by the Jet Propulsion  
105 Laboratory, California Institute of Technology, under a contract with NASA.

106

107

108 **References in the Supplement**

109

110 Clough, S. A., Shephard, M. W., Mlawer, E. J., Delamere, J. S., Iacono, M. J., Cady-  
111 Pereira, K., Boukabara, S., and Brown, R.D.: Atmospheric radiative transfer modeling: a  
112 summary of the AER codes, *J. Quant. Spectrosc. Radiat. Transfer*, 91, 233–244, 2005.

113

114 Clough, S. A., Shephard, M. W., Worden, J., Brown, P. D., Worden, H. M., Luo, M.,  
115 Rodgers, C. D., Rinsland, C. P., Goldman, A., Brown, L., Kulawik, S. S., Eldering, A.,  
116 Lampel, M., Osterman, G., Beer, R., Bowman, K., Cady-Pereira, K. E., Mlawer, E. J.:  
117 *IEEE Transac. Geosci. Rem. Sens.*, 44(5), 1308-1323, 2006.

118

119 Moncet, J. L., Uymin, G., Lipton, A. E., and Snell, H. E.: Infrared radiance modeling by  
120 optimal spectral sampling, *J. Atmos. Sci.*, 65, 3917–3934, 2008.

121

122 Rothman, L. S., Gordon, I. E., Babikov, Y., Barbe, A., Chris Benner, D., Bernath, P. F.,  
123 Birk, M., Bizzocchi, L., Boudon, V., Brown, L. R., Campargue, A., Chance, K., Cohen,

124 E. A., Coudert, L. H., Devi, V. M., Drouin, B. J., Fayt, A., Flaud, J.-M., Gamache, R. R.,  
125 Harrison, J. J., Hartmann, J.-M., Hill, C., Hodges, J. T., Jacquemart, D., Jolly, A.,  
126 Lamouroux, J., Le Roy, R. J., Li, G., Long, D. A., Lyulin, O. M., Mackie, C. J., Massie,  
127 S. T., Mikhailenko, S., Müller, H. S. P., Naumenko, O. V., Nikitin, A. V., Orphal, J.,  
128 Perevalov, V., Perrin, A., Polovtseva, E. R., Richard, C., Smith, M. A. H., Starikova, E.,  
129 Sung, K., Tashkun, S., Tennyson, J., Toon, G. C., Tyuterev, V. G., and Wagner, G.: The  
130 HITRAN2012 molecular spectroscopic database, *J. Quant. Spectrosc. Radiat. Transfer*,  
131 130, 4–50, 2013.
